# Supplementary material
Source: PubMed Central journal article supplement (PMC4496594)
Supplement: IAI.00322-15_zii999091341so1.pdf [file IAI.00322-15_zii999091341so1.pdf]

**Figure S1**

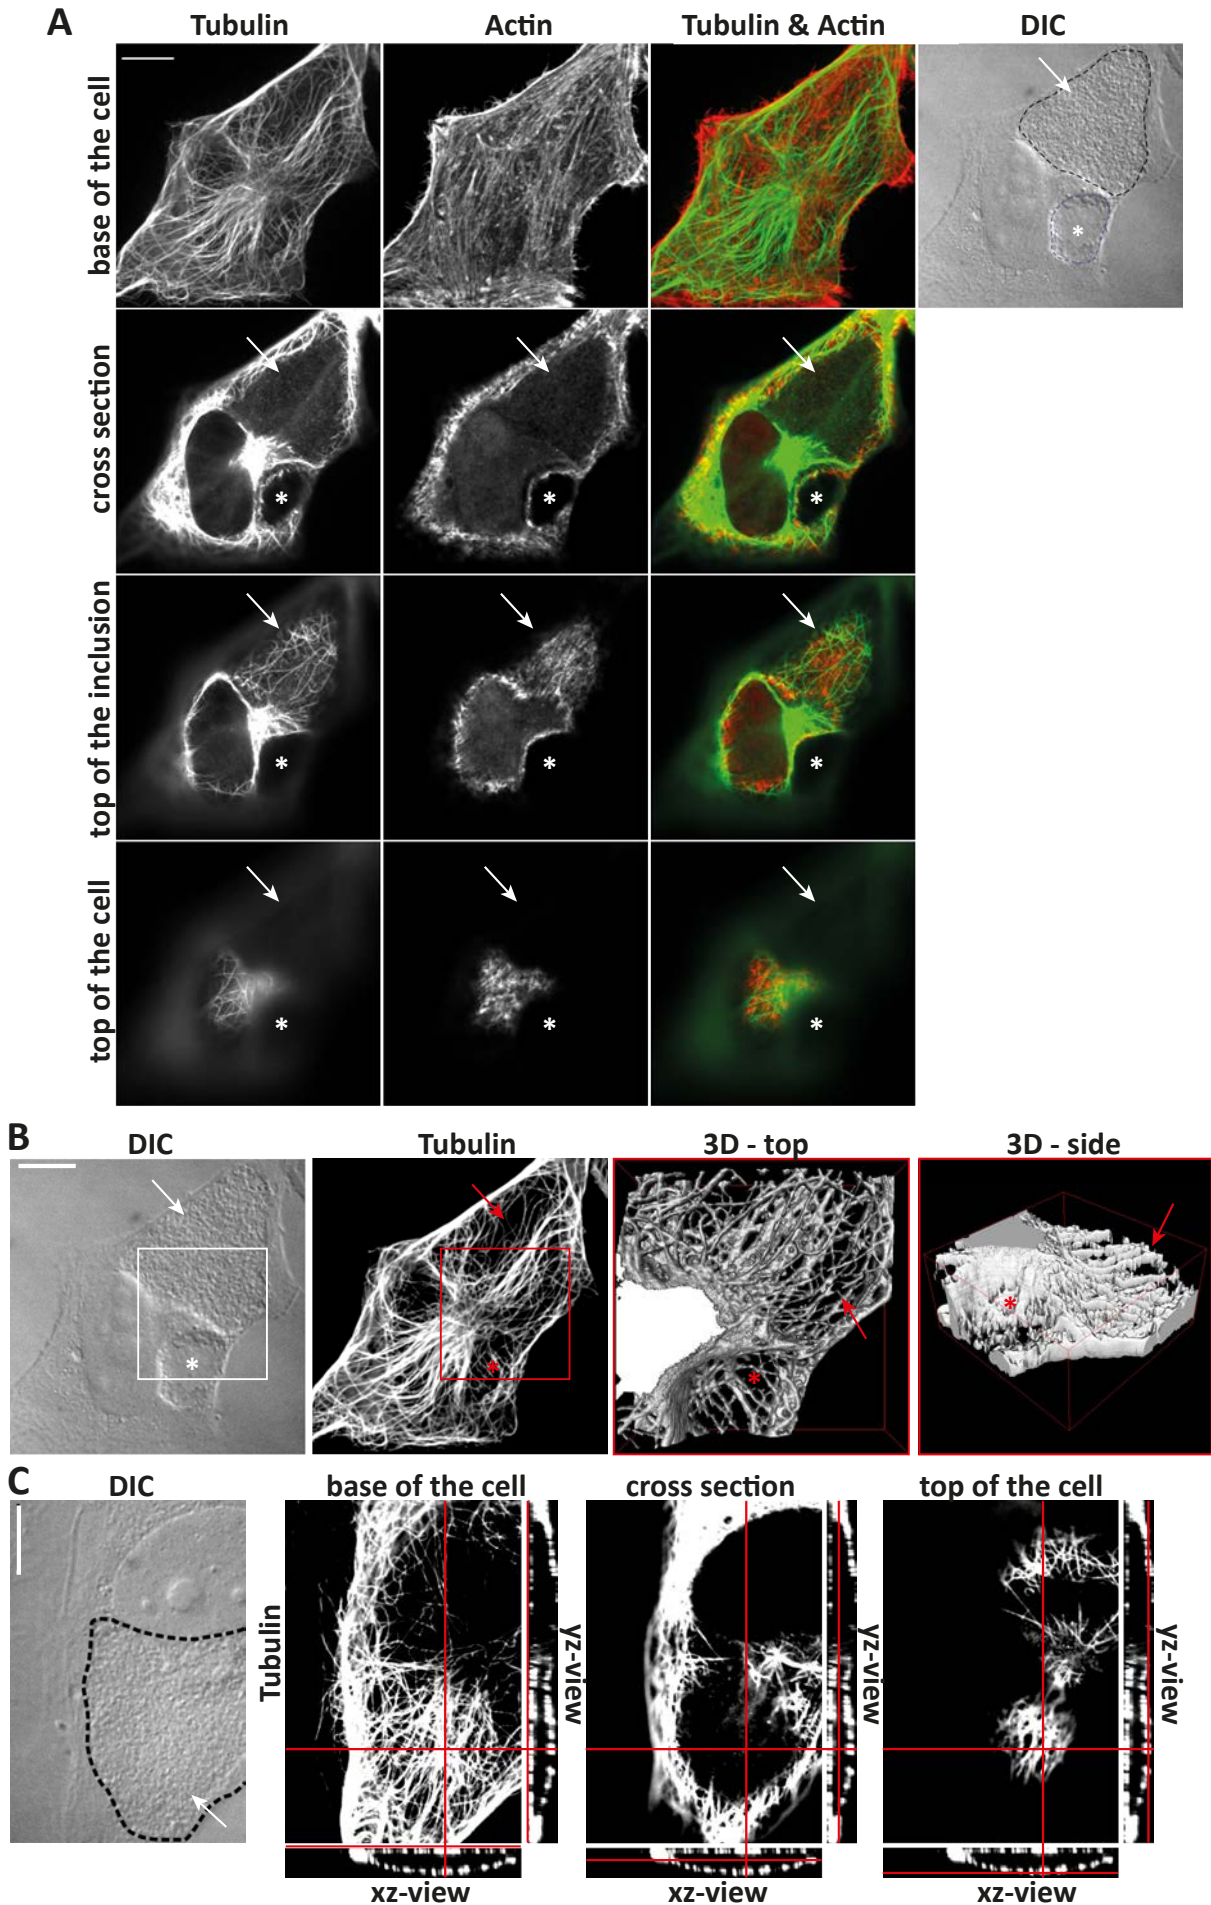

**Figure S1. Actin and tubulin arrangement in *W. chondrophila* infected cells.**

HeLa cells were infected with *W. chondrophila* (MOI 1) for 24 h, processed for immunofluorescence and stained for  $\alpha$ -tubulin (green) and F-Actin (red). **(A)** Confocal microscopic images showing the actin and tubulin arrangement around an inclusion (arrow) as well as a 'hole' (membrane surrounded structure, asterisk). **(B)** 3D-reconstruction of the microtubules around the inclusion and the 'hole' as in **(A)**. **(C)** Cross section of a *Waddlia* inclusion clearly showing a tubulin cage around the inclusion and no intra-inclusion signal. The intersection of the red lines indicates the position within the cell, where the respective confocal image was taken. Arrows point to inclusions, asterisks indicate 'holes'. DIC: differential interference contrast. The scale bars represent 10  $\mu$ m.

## Video S1

### **Video S1. *Waddlia chondrophila* inclusion growth in HeLa cells.**

HeLa cells were seeded for Live Cell Imaging, infected with *Waddlia chondrophila* (MOI 1) and at 22 h p.i. confocal microscopic movies were started. Pictures were taken every minute over a time frame of 4 hours. The scale bar represents 20  $\mu\text{m}$ .
